# Supplementary material
Source: PubMed Central journal article supplement (PMC3647981)
Supplement: IAI.00044-13_zii999090083so2.pdf [file IAI.00044-13_zii999090083so2.pdf]

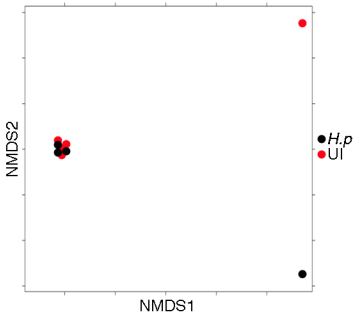

**A**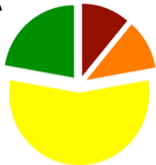

- Bacteroidetes
- Cyanobacteria
- Firmicutes
- Gammaproteobacteria\*

**B**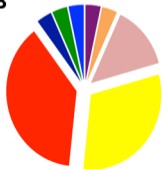

- GN02
- Actinobacteria
- Elusimicrobia
- Firmicutes
- Verrucomicrobia
- Epsilonproteobacteria\* (*H. pylori*)
- Gammaproteobacteria\*
- Deltaproteobacteria\*

**A**

Relative 16s rRNA level

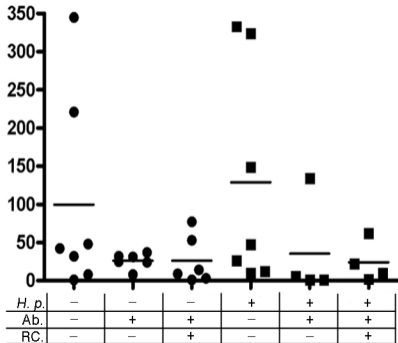**B**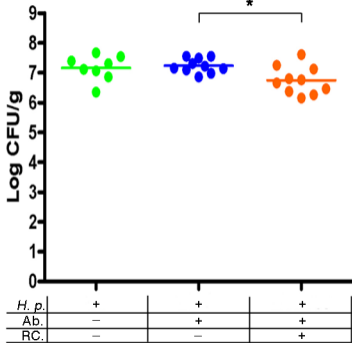

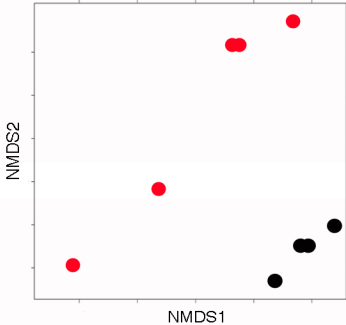

● Ab. Pretreat, *H.p.* infection

● *H. p.* infection
